1 **Title:** On the feasibility of mining CD8+ T-cell receptor patterns underlying immunogenic peptide recognition.

2 **Authors:** Nicolas De Neuter<sup>a,b,c</sup>, Wout Bittremieux<sup>a,b</sup>, Charlie Beirnaert<sup>a,b</sup>, Bart Cuypers<sup>a,b,d</sup>, Aida Mrzic<sup>a,b</sup>, Pieter

3 Moris<sup>a,b</sup>, Arvid Suls<sup>c,e,f</sup>, Viggo Van Tendeloo<sup>c,g</sup>, Benson Ogunjimi<sup>c,g,h,i,j</sup>, Kris Laukens<sup>a,b,c</sup>, Pieter Meysman<sup>a,b,c</sup>

4 **Affiliations:**

5 Advanced Database Research and Modelling (ADReM), Department of Mathematics and Computer Science,  
6 University of Antwerp, Antwerp, Belgium<sup>a</sup>

7 Biomedical Informatics Research Network Antwerp (biomina), University of Antwerp, Antwerp, Belgium<sup>b</sup>

8 AUDACIS, Antwerp Unit for Data Analysis and Computation in Immunology and Sequencing, University of  
9 Antwerp, Antwerp, Belgium<sup>c</sup>

10 Molecular Parasitology Unit, Department of Biomedical Sciences, Institute of Tropical Medicine, Antwerp,  
11 Belgium<sup>d</sup>

12 GENOMED, Center for Medical Genetics, University of Antwerp, Edegem, Belgium<sup>e</sup>

13 Center for Medical Genetics, Antwerp University Hospital, Edegem, Belgium<sup>f</sup>

14 LEH, Laboratory of Experimental Hematology, Vaccine & Infectious Disease Institute (VAXINFECTIO),  
15 University of Antwerp, Antwerp, Belgium<sup>g</sup>

16 Centre for Health Economics Research & Modeling Infectious Diseases (CHERMID), Vaccine & Infectious  
17 Disease Institute (VAXINFECTIO), University of Antwerp, Antwerp, Belgium<sup>h</sup>

18 Department of Paediatric Nephrology and Rheumatology, Ghent University Hospital, Ghent, Belgium<sup>i</sup>

19 Department of Paediatrics, Antwerp University Hospital, Edegem, Belgium<sup>j</sup>

20

21 Pieter Meysman and Kris Laukens contributed equally to this article.

22

23 **Corresponding author:**

24 Kris Laukens

25 University of Antwerp, Department of Mathematics and Computer Science

26 Middelheimlaan 1, 2020 Antwerpen, Belgium

27 e-mail: kris.laukens@uantwerpen.be

28 **Abstract:**

29 Current T-cell epitope prediction tools are a valuable resource in designing targeted immunogenicity  
30 experiments. They typically focus on, and are able to, accurately predict peptide binding and presentation by  
31 major histocompatibility complex (MHC) molecules on the surface of antigen-presenting cells. However,  
32 recognition of the peptide-MHC complex by a T-cell receptor is often not included in these tools. We developed  
33 a classification approach based on random forest classifiers to predict recognition of a peptide by a T-cell and  
34 discover patterns that contribute to recognition. We considered two approaches to solve this problem: (1)  
35 distinguishing between two sets of T-cell receptors that each bind to a known peptide and (2) retrieving T-cell  
36 receptors that bind to a given peptide from a large pool of T-cell receptors. Evaluation of the models on two  
37 HIV-1, B\*08-restricted epitopes reveals good performance and hints towards structural CDR3 features that can  
38 determine peptide immunogenicity. These results are of particularly importance as they show that prediction of  
39 T-cell epitope and T-cell epitope recognition based on sequence data is a feasible approach. In addition, the  
40 validity of our models not only serves as a proof of concept for the prediction of immunogenic T-cell epitopes  
41 but also paves the way for more general and high performing models.

## 42 **Introduction**

43 Immunoinformatics strives to computationally explore the increasingly large amounts of available  
44 immunological data by providing researchers with the necessary tools to gain novel insights into key processes  
45 of the immune system. The necessity of such immunoinformatics tools becomes particularly apparent in light of  
46 the huge complexity that underlies essential immunological processes. As the immune system has to be able to  
47 recognize a vast repertoire of non-self epitopes, it has adopted several strategies to cope with the wide range of  
48 pathogens and pathogen-derived epitopes it might come into contact with. To mount an adequate defence, the  
49 activation of the adaptive immune system requires recognition of these pathogen-derived epitopes by TCRs.  
50 Epitopes from within the cell and the extracellular environment are respectively bound by MHC class I and  
51 MHC class II molecules (Jensen 2007). The peptide-MHC (pMHC) complex is subsequently presented on the  
52 surface of the cell, where it can be recognized by the TCR of circulating CD8<sup>+</sup> T-cells (for MHC-I) or CD4<sup>+</sup> T-  
53 cells (for MHC-II) (Rossjohn et al. 2015). A cascade of downstream immunological pathways will then be  
54 triggered within the T-cell with the goal of eliminating the invading pathogen from which the epitope was  
55 derived. TCRs are able to bind such a wide variety of pMHC complexes due to the genetic recombination of the  
56 V and J regions in the TCR's  $\alpha$  chain and the V, D and J regions in the TCR's  $\beta$  chain (Kragel 2009). These  
57 recombination events results in an estimated  $10^{15}$  possible different TCRs (Turner et al. 2006).  
58 Both antigen processing and presentation by MHC molecules are well-studied processes and have been  
59 documented in detail for both MHC class I and MHC class II molecules. A range of immunoinformatics tools  
60 have addressed the fundamental question of which peptides will be presented by a certain MHC molecule (Soria-  
61 Guerra et al. 2015). Several of these tools are able to predict putative epitopes with high accuracy. Furthermore,  
62 they often account for biologically relevant pre-processing steps such as proteasomal cleavage of proteins and  
63 transport of peptides into the endoplasmic reticulum by TAP transporters (Stranzl et al. 2010). Despite the  
64 diversity of possible pMHC combinations, these tools offer researchers a reliable way of setting up focused  
65 immunogenicity experiments by reducing the number of peptides that need to be experimentally tested (7-11).  
66 The success of these prediction tools stems from both our intimate understanding of the underlying biochemical  
67 processes as well as from the large amounts of pMHC affinity data that are available in public repositories such  
68 as the Immune Epitope Database ([www.iedb.org](http://www.iedb.org)) (Vita et al. 2015). However, it is important to note that while it  
69 is required that immunogenic peptides are presented to T-cells by an MHC molecule, this is not sufficient to  
70 warrant recognition by a TCR and subsequently elicit an immune response. Although these pMHC prediction  
71 methods claim to predict T-cell epitopes, they do so without any knowledge or contribution from the T-cell

72 repertoire. These prediction tools are mainly able to differentiate between MHC-bound peptides, which could  
73 potentially be recognized by a TCR, and those peptides that are not bound by the specific MHC molecule under  
74 investigation. However, no such prediction tools exist for TCR-sequences and a given MHC-bound peptide and  
75 it is a concern if such predictions are even possible given the complexity of the recognition and the lower  
76 quantity of data.

77 Previous research has demonstrated that there is a differential contribution of the amino acid position in the  
78 epitope to its immunogenicity (Calis et al. 2013). As the CDR3 region of the TCR is known to interact with the  
79 MHC presented peptide (Jorgensen et al. 1992), it is to be expected that structural determinants within this  
80 region also contribute significantly to peptide recognition. In this study, we demonstrate the feasibility of  
81 constructing accurate TCR-epitope recognition predictors based on the amino acid sequence of the TCR protein.  
82 We explore the patterns underlying the interaction between peptides and TCRs, focusing on those patterns within  
83 the CDR3 region that determine epitope recognition.

## 84 **Results**

85 Data on peptide-TCR interactions was collected from Costa et al. (2015) for two well-defined and dominant  
86 HLA-B\*08-restricted HIV-1 epitopes. Control data, consisting of CD8+, HLA-B\*08-restricted TCR $\beta$  sequences,  
87 was retrieved from the ImmuneACCESS database. For each dataset, the following descriptive statistics were  
88 calculated: total number of TCR $\beta$  sequences, unique CDR3 sequences, V/J families and V/J genes and the  
89 Shannon-Wiener diversity of CDR3 sequences, V/J families and V/J genes (table 1). Higher Shannon-Wiener  
90 diversity values reflect a more uniform population and/or a population with more unique samples. CDR3  
91 sequences are the most diverse component in all datasets, followed by V gene diversity, J gene diversity, V  
92 family diversity and finally J family diversity. While the majority of CDR3 sequences that occur in a given  
93 dataset are unique, some CDR3 sequences do frequently reoccur, though the number of reoccurring CDR3  
94 sequences is several orders of magnitudes lower. The negative control set is always the most diverse when  
95 comparing diversity between datasets, except for J family diversity, where the usage is slightly more uniformly  
96 spread across the data for the negative control TCRs than the epitope-specific TCRs. These results indicate a  
97 slightly restricted diversity of the epitope-specific TCR datasets when compared to the negative control set  
98 (figure 1).

### 99 *A highly performant classifier to distinguish two target epitopes*

100 To test whether it is feasible to predict binding between a CD8+ T-cell's TCR $\beta$  and an epitope, we first tested a  
101 'one-versus-one', random forest classifier scheme where the classifier attempts to predict which of the two HIV  
102 epitopes a TCR sequence is most likely to be bound in a mutually exclusive way. The input features were  
103 derived from the V and J genes as well as the CDR3 sequence of the  $\beta$  chain of the TCR. The performance of  
104 this classifier was evaluated within a repeated subsampling validation approach in which part of the data is used  
105 as an independent test set for the trained classifier. This validation showed that the average classifier had a mean  
106 accuracy of 75.90%  $\pm$  5.45%, a mean AUC of 0.84  $\pm$  0.05 and a mean PR of 0.81  $\pm$  0.06 (FLKEKGGL) and 0.89  
107  $\pm$  0.04 (EIYKRWII) on independent test data. The high accuracy indicates that, in general, there is a high rate of  
108 both true positives and true negatives; in essence, the classifier is able to correctly assign to which peptide a  
109 given TCR will bind. As AUC values range from 1 (perfect prediction) to 0 (completely wrong prediction), with  
110 a value of 0.5 representing completely randomly assigned labels, the resulting average AUC value demonstrates  
111 that the classifier performs significantly better than random (one sample t-test;  $p < 0.001$ ) (figure 2a). Finally, the  
112 mean PR, ranging between 0 (no true positives among predicted positives) and 1 (only true positives among

113 predicted positives), demonstrates that the averaged classifier is able to retain a high predictive quality even  
114 under increasing numbers of predicted positives (figure 2b, 2c).

115 Features with high discriminatory power within the classifier can be supposed to play prominent roles within the  
116 biological recognition process between peptide and TCR. We thus investigated which features were most  
117 important during the model's classification process. Despite the high number of features included in the  
118 classifier due to the positional encoding employed, only a limited number of features were assigned a large  
119 importance within the classification scheme (figure 2d). High-scoring features included averaged  
120 physicochemical properties (basicity, helicity, hydrophobicity) as well as physicochemical properties of the  
121 amino acids located slightly upwards of the centre of the CDR3 region (position 1 and 2). The only feature  
122 directly linked to a single amino acid is the overall arginine count within the CDR3. A notable absence of  
123 features encoding for single amino acids or V/J genes was observed among highly discriminatory features, even  
124 though they make up the bulk of the generated features.

#### 125 *Epitope-specific TCRs can be picked out of a large TCR background*

126 Evaluation of the 'one-versus-one' classifier scheme shows that differentiating between two peptides based on  
127 TCR $\beta$  sequence derived features is a feasible task. However, the scope of such a classifier remains limited in its  
128 applicability. To explore to which extent TCR $\beta$  sequence information can support sequence based TCR epitope  
129 predictors, we generalized the problem to identifying TCR $\beta$ s that bind a given peptide from a larger set of  
130 TCR $\beta$ s. This 'one-versus-many' scheme was applied and tested for both the FLKEKGGL and EIYKRWII  
131 peptide using non-epitope specific HLA-B\*08-restricted, CD8+ TCR sequences as a negative control. While it is  
132 not known whether any of these control T-cell receptor sequences are capable of recognizing either B\*08-  
133 FLKEKGGL or B\*08-EIYKRWII, the upper limit of the expected abundance of T-cells that recognize a specific  
134 HLA-peptide combination has been estimated at 100 cells per million naïve T-cells (Jenkins and Moon 2012).  
135 As such, we assume that very few to none of these TCR $\beta$ s are capable of interacting in a functionally relevant  
136 way with either of two HIV epitopes.

137 On the FLKEKGGL as well as the EIYKRWII peptide, the same pipeline was applied. TCR $\beta$  sequence features  
138 were generated in the same way as in the 'one-versus-one' classifier scheme. The performance of a classifier  
139 trained following the 'one-versus-many' scheme was evaluated within a repeated subsampling validation  
140 approach. Evaluation of the classifier revealed a mean accuracy of  $93.78\% \pm 0.66\%$ , a mean AUC of  $0.80 \pm 0.05$   
141 and a mean PR of  $0.52 \pm 0.06$  for the EIYKRWII peptide. For the FLKEKGGL peptide, a mean accuracy of  
142  $94.45\% \pm 0.72\%$ , a mean AUC  $0.82 \pm 0.05$  and a mean PR  $0.61 \pm 0.07$  were obtained. Evaluation metrics

143 again indicate that both classifiers perform significantly better than random based on the AUC value ( $p < 0.001$   
144 for both the EIYKRWII and FLKEKGGL peptide) (figure 3a, 3b) and reach similar performance levels as the  
145 ‘one-versus-one’ approach. The accuracy seemingly increases for the ‘one-versus-many’ classifiers as a  
146 consequence of class imbalance in the dataset (10 negative cases for every positive case) and is thus only  
147 marginally higher than the base accuracy of 0.91. PR values drop rapidly in comparison to the ‘one-versus-one’  
148 scheme, likely also due to the class imbalance (figure 3c, 3d). With a higher number of negative classes, it  
149 becomes increasingly more difficult to retain a high predictive quality of the positive class and a low number of  
150 false positive predictions already severely affects precision. Given the increased complexity of the task, the  
151 slight drop in performance of the ‘one-versus-many’ classifiers is not completely unexpected. However, ‘one-  
152 versus-many’ classifiers are able to retain a high level performance level and reinforce the feasibility of creating  
153 more complex TCR epitope predictors. Differences in performance between the two ‘one-versus-many’  
154 classifiers are likely to be a consequence of the number of patterns captured by the classifier that underlie  
155 recognition of the p-MHC by the TCR chain under investigation.

#### 156 *Discriminatory features are similar in the one-versus-one or one-versus-many setting*

157 To further explore the patterns captured by the classifier, highly discriminatory features were extracted from the  
158 classifier. Discriminatory features for the EIYKRWII peptide are focused on basicity and hydrophobicity,  
159 reflecting a similar pattern of features as found for the ‘one-versus-one’ scheme (figure 3e). Average basicity of  
160 the CDR3 amino acid sequence and basicity/hydrophobicity of amino acids near the centre of the CDR3  
161 sequence seem to play the important roles next to the isoelectric point of the CDR3 sequence. The number of  
162 arginines within the CDR3 sequence was again found to be a discriminatory feature and potentially provides a  
163 more specific insight into the structural dimension of the interaction characteristics. While the FLKEKGGL  
164 peptide based classifier also relies heavily on hydrophobicity derived features of the CDR3 region to  
165 discriminate between binding and non-binding TCRs, helicity derived features seem to replace basicity derived  
166 features in importance. Similarly as to the most important features for the EIYKRWII peptide, these  
167 physicochemical properties seem to be concentrated near the centre of the CDR3 sequence (figure 3f). The  
168 CDR3 sequence’s length seems to be another important contributing factor together with the number of lysines  
169 in the CDR3 sequence. Overall, important features for both ‘one-versus-many’ based classifiers match well with  
170 those found for the ‘one-versus-one’ classifier, indicating that classifiers are able to faithfully retrieve important  
171 epitope-recognition patterns, even in different contexts.

#### 172 *More TCR training samples result in a more performant classifier*

173 Finally, to investigate the influence of the size of the training data on the performance both the ‘one-versus-one’  
174 and ‘one-versus-many’ classifiers, models were trained with and without independent test data on increasing  
175 training data sizes. Regardless of the size of the training data, classifiers always performed with perfect accuracy  
176 if no independent test data was used, as can be expected from classification frameworks (figure 4, 5). In contrast,  
177 classifiers with independent test data benefited from increases in training data size and are likely to improve  
178 even further given a sufficiently large body of training data. As such, at least within the context of these  
179 classification schemes, the performance is likely to benefit from increases in experimental data.



## 180 **Discussion**

181 In this paper, we set out to examine the feasibility of predicting epitope specificity from the sequence patterns  
182 contained within the TCR. Based on training data collected for 2 HIV-1 derived, B\*08-restricted peptides, we  
183 trained random forest classifiers utilizing two different schemes to test whether TCR epitope prediction based on  
184 sequence level data is a feasible task. In the first, ‘one-versus-one’, scheme, the classifier was tasked to assign  
185 TCRs to either of two possible peptides. In the second, ‘one-versus-many’, scheme, classifiers were trained to  
186 find TCRs that bind to one specific peptide. In order to examine the properties that define the recognition of  
187 immunogenic peptides by a TCR, structural features were encoded representing the CDR3 amino acid sequence  
188 of the TCR  $\beta$ -chain as well as its respective V and J region.

189 As this is, to the best of our knowledge, the first attempt to tackle this problem at the TCR sequence level, it is  
190 not possible to compare its performance with other pre-existing classifiers. However, multiple performance  
191 evaluations indicate that the different classifiers performed reasonably well. The best performing scheme was the  
192 ‘one-versus-one’ scheme. However, the applications of this one-versus-one classifier are limited as it can only  
193 distinguish between the TCR sequences that bind one of two epitopes. Indeed, the importance of this classifier  
194 lies not in its immediate practical applicability, but rather in the framework it provides for future TCR-peptide  
195 recognition models and the insights that might be gained from these models. We can suppose that, given enough  
196 data for a large number of epitopes, this binary classifier can be expanded into a framework to predict the target  
197 epitope for any TCR sequence.

198 To demonstrate a more practical application, we incorporated negative control data from a large set of HLA-  
199 B\*08-restricted TCR $\beta$ s into ‘one-versus-many’ classification schemes. During these more difficult ‘one-versus-  
200 many’ classification schemes, performance was still high enough to prove that sequence level based models are  
201 capable of discriminating between epitope binders and non-binders. The good performance on held-out  
202 validation data, indicates that classifiers were likely able to capture real molecular features of the TCR $\beta$  CDR3  
203 sequence that underpin the differential recognition of an epitope by a TCR within a B\*08 context.

204 Of all the features generated, only a limited number of features had a high importance score within a given  
205 classifier. Supporting the likelihood that classifiers were able to consistently capture important features, high  
206 scoring features were generally shared across the different presented classifier setups. These features generally  
207 encoded either physicochemical properties averaged over the entire CDR3 region or physicochemical properties  
208 of amino acids located near its centre, with basicity and hydrophobicity as the most prominent physicochemical  
209 features. These findings correspond well with previous literature describing pMHC recognition by TCRs to be

210 mediated by molecular interactions between the CDR loops and the pMHC complex, where the CDR3 loop  
211 plays a prominent role during epitope recognition (Jorgensen et al. 1992). As such, CDR3 loops with comparable  
212 physicochemical properties are likely to interact in similar ways with epitopes. In addition, the high rank of  
213 central physicochemical amino acid features suggests that these amino acids might be key in determining TCR  
214 specificity. The number of arginines in the CDR3 loop is one of two features capturing specific single amino  
215 acid data within the list of highly ranked features. Interestingly, arginine has previously been identified as a  
216 strongly conserved amino acid within the CDR3 $\alpha$  loop of CD8<sup>+</sup> T-cells recognising a HIV-1 epitope (Motozono  
217 et al. 2014).

218 Although the immediate applicability of the binary, ‘one-versus-one’ peptide classifier is limited in scope, its  
219 good performance illustrates the feasibility of creating high-performing p-TCR affinity models. We further  
220 demonstrate this feasibility by creating random forest classifiers that can distinguish TCRs that bind a specific  
221 epitope. Next to the binary classifier, these more general ‘one-versus-many’ classifier schemes set the stage for  
222 the development of more complex TCR prediction models in the future. Despite only using sequence  
223 information for the TCR  $\beta$ -chain, classifiers were able to differentiate their targeted epitope with high accuracy.  
224 In addition, the classifiers agree on highly discriminatory features, even for different classifiers contexts and are  
225 thus likely able to uncover important structural features. Thus it seems that the recognition determinants  
226 contained within the  $\beta$ -chain are already sufficient to predict epitope binding. These results do still leave room  
227 for increased performance. Indeed, learning curves for the different classifier schemes suggests that performance  
228 increases can still be gained by incorporating new training data. These results indicate that current models are  
229 therefore not necessarily bound by technical limitations but rather by a lack of suitable training data. As we  
230 anticipate the amount of available MHC-peptide-TCR data to increase in the future, we expect sequence based  
231 models to quickly gain in performance and become a valuable aid in future immunological studies. In particular,  
232 insights and advancements into TCR recognition of immunogenic epitopes might prove crucial in studies of  
233 auto-immunity, tumour susceptibility and vaccine design.

## 234 **Materials & Methods**

### 235 *Data collection*

236 Training data on T-cell receptor sequences and peptides were obtained from Costa et al. (2015). In this study, T-  
237 cells from chronically infected HIV-1 patients were stained with MHC tetramers and sorted by flow cytometry to  
238 select for CD8<sup>+</sup> tetramer-positive T-cells. After extraction of mRNA from sorted T-cells, reverse transcription  
239 PCR was used to linearly amplify TCR $\beta$  chain sequences. PCR products were then transformed into *E. coli*  
240 bacteria, amplified and sequenced using capillary electrophoresis. From the data generated by Costa et al. (Costa  
241 et al. 2015), we collected TCR $\beta$  chain sequences from peptide-specific CD8<sup>+</sup> T-cells for two HIV-1 derived  
242 HLA-B\*08-restricted peptides (FLKEKGGL and EIYKRWII). In total, 95 TCR $\beta$  chains were collected for the  
243 FLKEKGGL peptide and 142 TCR $\beta$  chains for the EIYKRWII peptide.

244 Negative control data was obtained by querying the ImmuneACCESS database  
245 (<https://clients.adaptivebiotech.com/immuneaccess>) using the following terms: 'human', 'TCR $\beta$ ', 'HLA-B\*08',  
246 'CD8<sup>+</sup>' and 'control'; which returned 66235 TCR $\beta$  chain sequences originating from a single individual. From  
247 these, 56023 unique, productive, in-frame sequences were withheld.

248 For each obtained TCR $\beta$  chain, the following information was collected: V family, J family, V gene, J gene, and  
249 CDR3 sequence; with V/J families and genes as defined by the Immunogenetics Information System  
250 ([www.imgt.org](http://www.imgt.org)) (Lefranc et al. 2015). D genes were not collected separately as the CDR3 sequence contains the  
251 D region's sequence information.

### 252 *Feature creation*

253 Several features were derived for each of the collected TCR $\beta$  chains. Each observed V or J gene was represented  
254 as a single feature. This feature was assigned a value of 0 or 1, representing respectively the absence or presence  
255 of the gene in a specific TCR $\beta$  chain. Because the V or J gene was not always available, the V and J family were  
256 also encoded in a similar way. The following properties were encoded as numeric features: the TCR CDR3  
257 sequence length; the absolute count of each individual amino acid in the CDR3 sequence; the total mass of the  
258 amino acids in the CDR3 sequence; and the average CDR3 basicity, hydrophobicity, helicity, isoelectric point,  
259 and mutation rate. The average CDR3 mutation rate was calculated by taking the average of the mutation rate for  
260 each amino acid in the CDR3 sequence, where the mutation rate of an amino acid is obtained from the diagonal  
261 of a PAM250 substitution matrix. Physicochemical amino acid property values were used as described in  
262 MS2PIP (Degroeve et al. 2013). Positional features were added for each CDR3 residue position. Due to the  
263 variable length of the CDR3 sequences present in the data, amino acid positions were translated into numerical

264 positions by assigning each position an index value relative to the centre of the CDR3 sequence. For example, a  
265 sequence of length 3 would be encoded by the positions -1, 0 and 1 whereas a sequence of length 4 would be  
266 encoded as -2, -1, 1 and 2. For each position encoding generated in such a way, a binary feature was created  
267 representing the presence or absence of an amino acid at that position was encoded in the same way as the V and  
268 J genes. In addition, numerical features encoding individual amino acid basicity, hydrophobicity, helicity,  
269 isoelectric point, and mutation stability were also created for each position. Features were always created prior to  
270 model training and evaluation.

### 271 *Model training & evaluation*

272 Peptide binding was predicted using a random forest classifier (Breiman 2001) consisting of 200 trees, as  
273 implemented in Sci-kit learn (Pedregosa et al. 2011). To tackle the problem of predicting peptide binding to a  
274 TCR, a ‘one-versus-one’ scheme and a ‘one-versus-many’ scheme were employed. In the ‘one-versus-one’  
275 scheme, the classifier was tasked with correctly assigning whether a TCR binds to either the EIYKRWII peptide  
276 or the FLKEKGGL peptide. In the ‘one-versus-many’ scheme, the classifier had to distinguish between TCRs  
277 that bind a given peptide and TCRs that don’t bind the given peptide. The ‘one-versus-many’ scheme was  
278 applied for both the EIYKRWII and the FLKEKGGL peptide.

279 During the ‘one-versus-one’ scheme, both the positive and negative class samples were considered to be of equal  
280 importance and their weight was set at 1. For the ‘one-versus-many’ scheme, class weights were set to be  
281 inversely proportional to the number of samples for that class to compensate for the larger amount of negative  
282 training samples. Other hyperparameters of the classifier were left at their default values, as random forests are  
283 highly performant classifiers that typically achieve excellent performance out of the box (Caruana et al. 2008).

284 For the ‘one-versus-one’ scheme, the data was randomly subsampled 100 times into stratified 80%-20% training  
285 and testing data sets during model validation to provide a robust assessment of the classifier’s performance  
286 despite the limited amount of data available. In the ‘one-versus-many’ scheme, the classifier’s performance was  
287 assessed by creating 5 equally-sized, non-overlapping subsets from the positive data. For each positive subset, a  
288 subset of negative control samples equal to 10 times the amount of positive samples within the positive subset  
289 were randomly sampled without replacement from the negative control data. Positive and negative subset were  
290 then combined to generate a single fold. Training and test subsets were then created by using a single fold as test  
291 set while training the classifier on the remaining folds.

292 On each training set, feature selection was performed prior to training a new model using the Boruta algorithm  
293 (Kursa and Rudnicki 2010). For each new model, the following validation measures were calculated on the held-

294 out test data: prediction accuracy, the area-under-the-receiver-operating-characteristic-curve (AUC), and the  
295 mean precision over a recall range of 0 to 1 (PR). Overall classifier performance was evaluated in terms of  
296 prediction accuracy, AUC values, and mean PR values averaged over 100 random stratified training-test sets for  
297 the ‘-one-versus-one’ scheme and over 10 folds for the ‘one-versus-many’ scheme. The receiver-operating-  
298 characteristic curve and precision-recall curve were drawn up for each model as well. Here, precision is  
299 interpreted as how many of the TCRs predicted to bind peptide 1 actually bind peptide 1 and recall as how many  
300 of the TCRs that bind peptide 1 are predicted to bind peptide 1. Because PR values are computed for the peptide  
301 with 1 as label, for the ‘one-versus-one’ scheme, the PR values were also calculated with reversed labels to  
302 obtain PR values for both peptides. The evaluation measures were reported as their mean over the number of  
303 subsampled executions  $\pm$  their standard deviation.

304 Feature importance was evaluated based on the Gini importance (Hastie et al. 2009) to provide an overview of  
305 each feature’s ability to discriminate between the two peptides. In addition, classification accuracy was evaluated  
306 by drawing learning curves for increasing sizes of training data with and without independent test data.  
307 Classifiers with independent test data used a stratification and sampling scheme as described above for their  
308 respective schemes while classifiers without independent test data were tested on their training data.

309 All data and code used within this manuscript can be found in the following GitHub repository:  
310 <https://github.com/bittremieux/TCR-classifier>.

### 311 *Statistical analyses*

312 Statistical analyses were performed in Python. The Shannon-Wiener diversity was calculated using the Sci-kit  
313 bio package (<http://scikit-bio.org/>). Statistical results were considered significant whenever the (corrected) p-  
314 value  $< 0.05$ .

315 **Acknowledgments**

316 This research was funded by the University of Antwerp [BOF Concerted Research Action] and the Research

317 Foundation Flanders (FWO) [Personal PhD grants to NDN (151316), PMo (1141217N), BC (1101614N)]

318 **References**

- 319 Breiman L (2001) Random forests. *Mach Learn* 45:5–32. doi: 10.1023/A:1010933404324
- 320 Calis JJA, Maybeno M, Greenbaum JA, et al (2013) Properties of MHC Class I Presented Peptides That Enhance  
321 Immunogenicity. *PLoS Comput Biol* 9:e1003266. doi: 10.1371/journal.pcbi.1003266
- 322 Caruana R, Karampatziakis N, Yessenalina A (2008) An empirical evaluation of supervised learning in high  
323 dimensions. *Proc 25th Int Conf Mach Learn - ICML '08* 96–103. doi: 10.1145/1390156.1390169
- 324 Costa AI, Koning D, Ladell K, et al (2015) Complex T-Cell Receptor Repertoire Dynamics Underlie the CD8 T-  
325 Cell Response to HIV-1. *J Virol* 89:110–9. doi: 10.1128/JVI.01765-14
- 326 Degroeve S, Martens L, Jurisica I (2013) MS2PIP: A tool for MS/MS peak intensity prediction. *Bioinformatics*  
327 29:3199–3203. doi: 10.1093/bioinformatics/btt544
- 328 Hastie T, Tibshirani R, Friedman J (2009) The Elements of Statistical Learning. *Elements* 1:337–387. doi:  
329 10.1007/b94608
- 330 Jenkins MK, Moon JJ (2012) The role of naive T cell precursor frequency and recruitment in dictating immune  
331 response magnitude. *J Immunol* 188:4135–40. doi: 10.4049/jimmunol.1102661
- 332 Jensen PE (2007) Recent advances in antigen processing and presentation. *Nat Immunol* 8:1041–1048. doi:  
333 10.1038/ni1516
- 334 Jorgensen JL, Esser U, Groth BF de S, et al (1992) Mapping T-cell receptor–peptide contacts by variant peptide  
335 immunization of single-chain transgenics. *Nature* 355:224–230. doi: 10.1038/355224a0
- 336 Krangel MS (2009) Mechanics of T cell receptor gene rearrangement. *Curr. Opin. Immunol.* 21:133–139.
- 337 Kursu MB, Rudnicki WR (2010) Feature Selection with the Boruta Package. *J Stat Softw* 36:1–13. doi: Vol. 36,  
338 Issue 11, Sep 2010
- 339 Lefranc MP, Giudicelli V, Duroux P, et al (2015) IMGT R, the international ImMunoGeneTics information  
340 system R 25 years on. *Nucleic Acids Res* 43:D413–D422. doi: 10.1093/nar/gku1056
- 341 Meysman P, Ogunjimi B, Naulaerts S, et al (2015) Varicella-Zoster Virus-Derived Major Histocompatibility  
342 Complex Class I-Restricted Peptide Affinity Is a Determining Factor in the HLA Risk Profile for the  
343 Development of Postherpetic Neuralgia. *J Virol* 89:962–969. doi: 10.1128/JVI.02500-14
- 344 Motozono C, Kuse N, Sun X, et al (2014) Molecular Basis of a Dominant T Cell Response to an HIV Reverse  
345 Transcriptase 8-mer Epitope Presented by the Protective Allele HLA-B\*51:01. *J Immunol* 192:3428–34.  
346 doi: 10.4049/jimmunol.1302667
- 347 Mustafa AS (2013) In silico analysis and experimental validation of mycobacterium tuberculosis-specific  
348 proteins and peptides of mycobacterium tuberculosis for immunological diagnosis and vaccine

- 349 development. *Med. Princ. Pract.* 22:43–51.
- 350 Pedregosa F, Varoquaux G, Gramfort A, et al (2011) Scikit-learn: Machine Learning in Python. *J Mach Learn*  
351 *Res* 12:2825–2830.
- 352 Rossjohn J, Gras S, Miles JJ, et al (2015) T cell antigen receptor recognition of antigen-presenting molecules.  
353 *Annu Rev Immunol* 33:169–200. doi: 10.1146/annurev-immunol-032414-112334
- 354 Soria-Guerra RE, Nieto-Gomez R, Govea-Alonso DO, Rosales-Mendoza S (2015) An overview of  
355 bioinformatics tools for epitope prediction: Implications on vaccine development. *J. Biomed. Inform.*  
356 53:405–414.
- 357 Stranzl T, Larsen MV, Lundegaard C, Nielsen M (2010) NetCTLpan: Pan-specific MHC class I pathway epitope  
358 predictions. *Immunogenetics* 62:357–368. doi: 10.1007/s00251-010-0441-4
- 359 Turner SJ, Doherty PC, McCluskey J, Rossjohn J (2006) Structural determinants of T-cell receptor bias in  
360 immunity. *Nat Rev Immunol* 6:883–894. doi: 10.1038/nri1977
- 361 Vita R, Overton JA, Greenbaum JA, et al (2015) The immune epitope database (IEDB) 3.0. *Nucleic Acids Res*  
362 43:D405–D412. doi: 10.1093/nar/gku938
- 363



364 **Figures & tables**

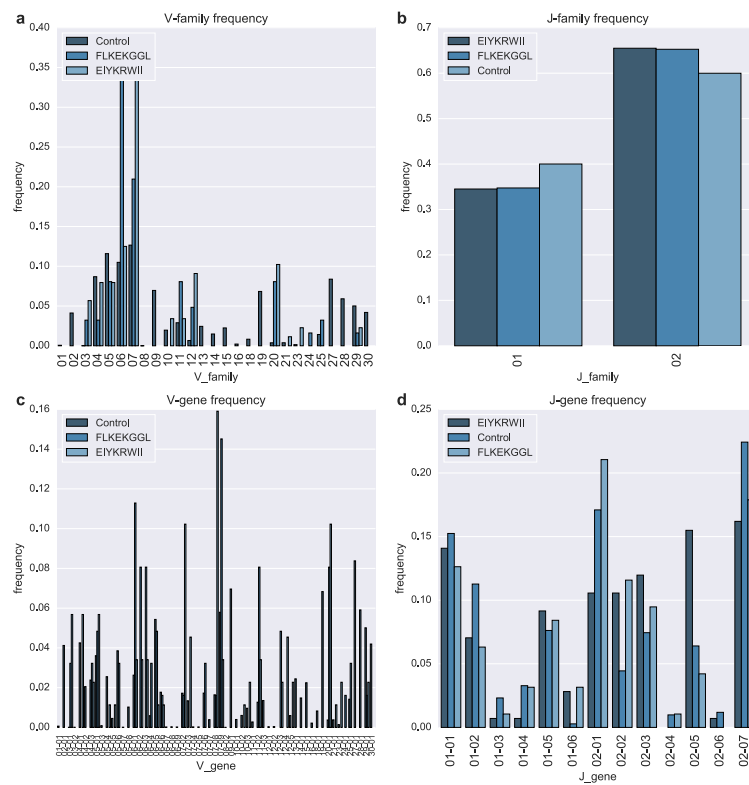

365

366 **Fig. 1** Segment usage across datasets. Segment usage is compared in terms of occurrence frequency at (a) V  
367 family, (b) J family, (c) V gene and (d) J gene level. Overall, no single segment distributions of segment usage  
368 are similar across different datasets, with slightly more restricted usage of segments in the peptide datasets, as is  
369 also reflected by the Shannon diversity (table 1)

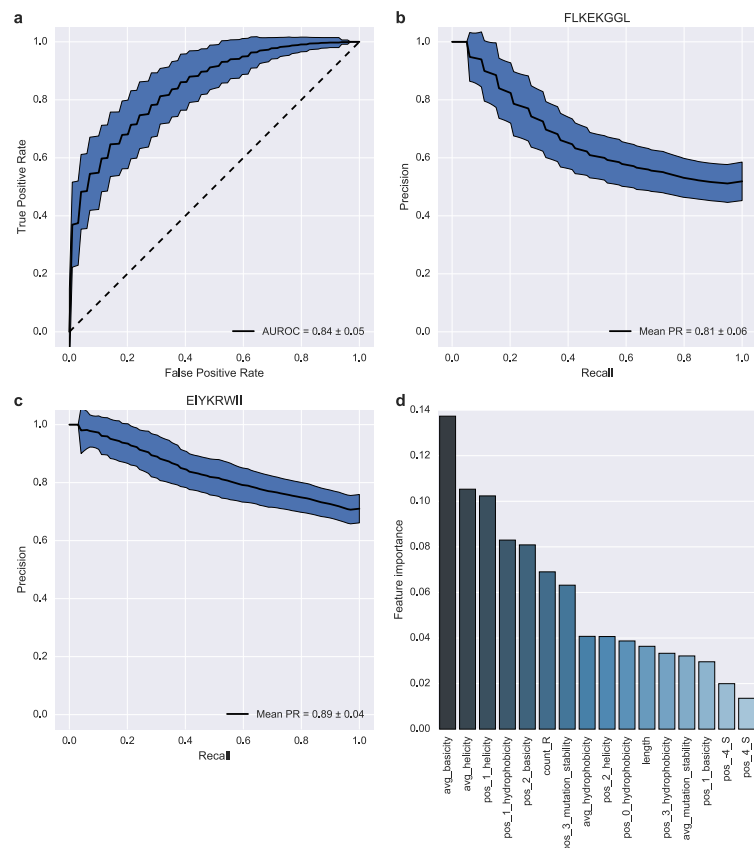

370

371 **Fig. 2** (a) Receiver-operating-characteristics curve or true positive rate versus false positive rate. Averaged  
372 values were plotted as a single line while the surrounding area indicates the standard deviation as observed  
373 during cross-validation. The striped diagonal indicates the performance of a random classifier where no  
374 distinction between the two peptides can be made based on TCR features. The more the average AUC curve is  
375 shifted towards the top left corner of the figure and away from the diagonal, the higher the performance of the  
376 evaluated classifier. (b, c) Precision versus recall. Averaged values were plotted as a single line while the  
377 surrounding area indicates the standard deviation as observed during cross-validation. In the perfect case, the PR  
378 curve is a horizontal line with precision always equal to 1, representing the lack of false positive predictions over  
379 the entire recall range. (d) Ranked feature importance. Features were generated based on the following TCR  
380 sequence derived characteristics: V gene, J gene, averaged CDR3 amino acid counts, positional CDR3 amino  
381 acid presence, averaged CDR3 amino acid physicochemical properties, and positional CDR3 amino acid  
382 physicochemical properties. Features are ranked on the x-axis according to their importance within the decision  
383 tree scheme of the random forest classifier as plotted on the y-axis

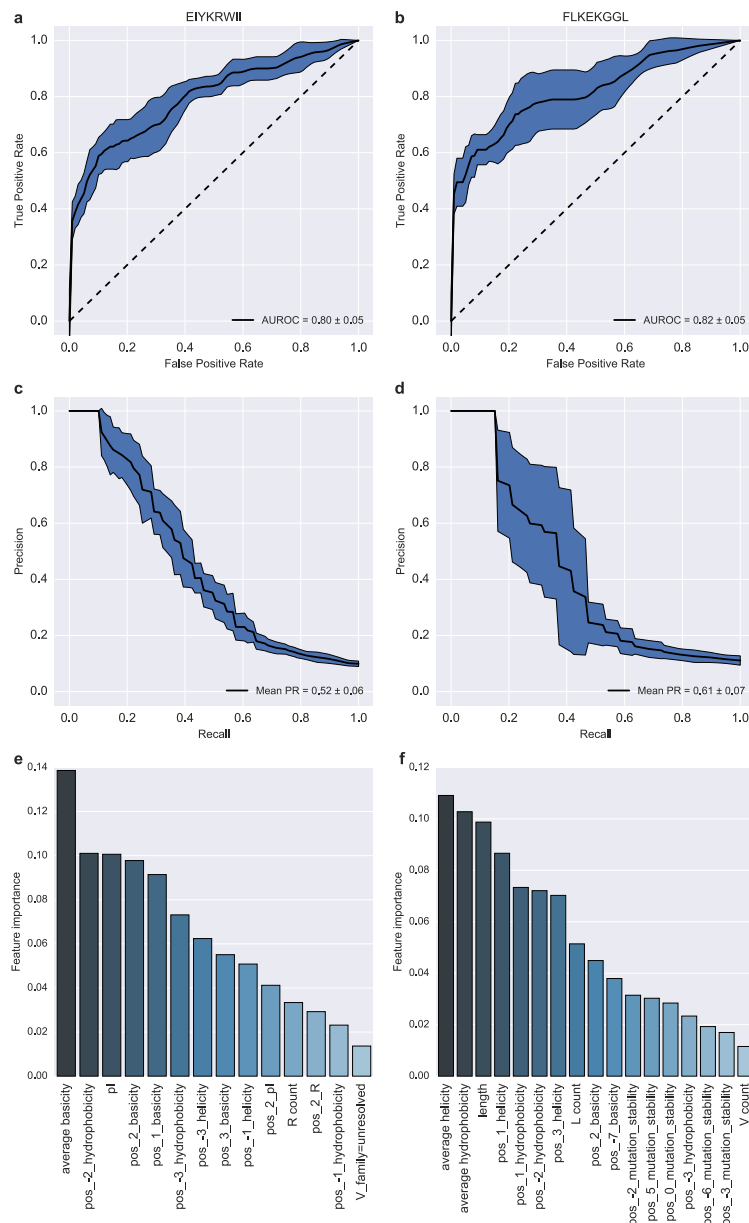

384

385 **Fig. 3** Comparison of the validation measures and feature importances for each peptide using the one-versus-

386 many scheme. (a, b) Receiver-operating-characteristics curve or true positive rate versus false positive rate.

387 Averaged values were plotted as a single line while the surrounding area indicates the standard deviation as

388 observed during cross-validation. The striped diagonal indicates the performance of a random classifier where no

389 distinction between the two peptides can be made based on TCR features. The more the average AUC curve is

390 shifted towards the top left corner of the figure and away from the diagonal, the higher the performance of the

391 evaluated classifier. (c, d) Precision versus recall. Averaged values were plotted as a single line while the

392 surrounding area indicates the standard deviation as observed during cross-validation. In the perfect case, the PR

393 curve is a horizontal line with precision always equal to 1, representing the lack of false positive predictions over

394 the entire recall range. (e, f) Ranked feature importance. Features were generated based on the following TCR

395 sequence derived characteristics: V gene, J gene, averaged CDR3 amino acid counts, positional CDR3 amino  
396 acid presence, averaged CDR3 amino acid physicochemical properties, and positional CDR3 amino acid  
397 physicochemical properties. Features are ranked on the x-axis according to their importance within the decision  
398 tree scheme of the random forest classifier as plotted on the y-axis

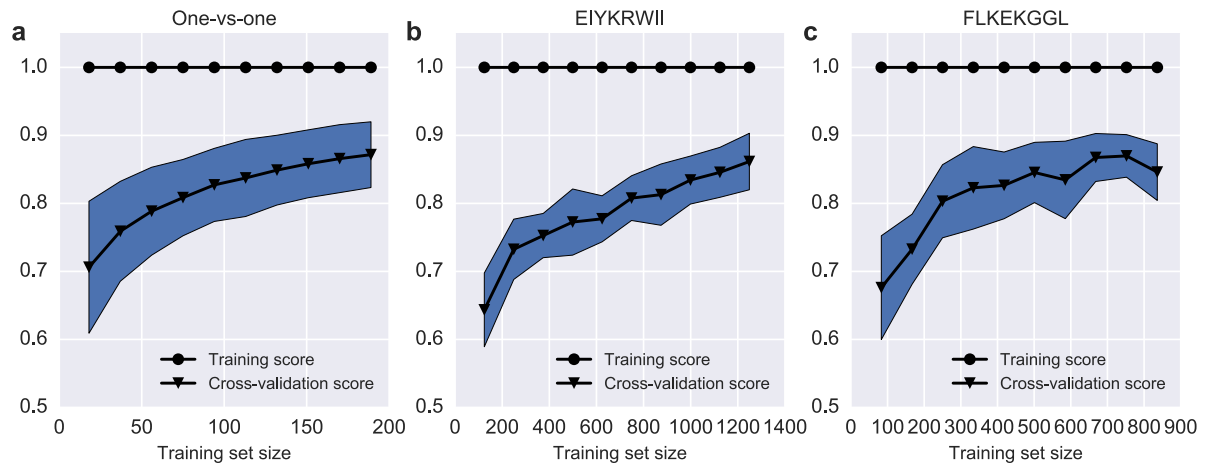

399

400 **Fig. 4** Learning curve for the different classifier schemes: (a) ‘one-versus-one’ scheme, (b) ‘one-versus-many’  
401 scheme for the E1YKRWII peptide, (c) ‘one-versus-many’ scheme for the FLKEKGGL peptide. Influence of  
402 training data size on the accuracy of classifiers with access to all training data (blue dots) and cross-validated  
403 classifiers (green dots). AUC values were compared for 10 different training data sizes. Mean AUC values for  
404 fitted classifiers without independent test data are shown in blue while AUC values for cross-validated classifiers  
405 are shown in green. Surrounding areas of the curve indicate the variation in AUC values during cross-validation

406 **Table 1.** Descriptive statistics of all datasets. Diversity statistics were calculated based on the Shannon diversity.

| Peptide               | EIYKRWII | FLKEKGGL | Control |
|-----------------------|----------|----------|---------|
| total number of TCRBs | 142      | 95       | 56      |
| unique CDR3 sequences | 119      | 70       | 54      |
| CDR3 diversity        | 6,82     | 5,92     | 15,71   |
| unique V families     | 19       | 18       | 27      |
| unique V genes        | 33       | 28       | 63      |
| unique J families     | 2        | 2        | 2       |
| unique J genes        | 12       | 12       | 14      |
| V gene diversity      | 4,41     | 4,44     | 5,07    |
| V family diversity    | 3,65     | 3,61     | 4,19    |
| J gene diversity      | 3,17     | 3,18     | 3,16    |
| J family diversity    | 0,93     | 0,93     | 0,97    |

407
